# Supplementary material for: A Comprehensive Exploration on Occurrence, Distribution and Risk Assessment of Potentially Toxic Elements in the Multi-Media Environment from Zhengzhou, China
Source: MDPI journal article supplement (doi:10.3390/toxics11020140), 2023-01-31
Supplement: s1 [file s1]

# Supplementary Materials: A Comprehensive Exploration on Occurrence, Distribution and Risk Assessment of Potentially Toxic Elements in the Mul-ti-Media Environment from Zhengzhou, China

Jialu Li, Qiting Zuo, Hao Hu, Feng Feng, Hongtao Jia and Yingxin Ji

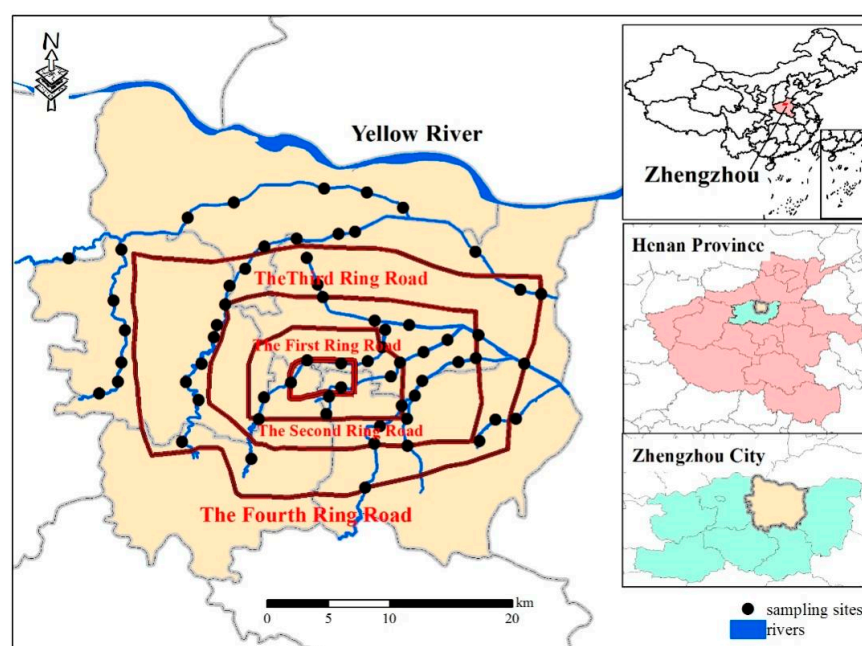

**Figure S1.** Study area and sampling sites in Zhengzhou.

**Table S1.** The recovery rate of standard soil (North Plain soil (GSS-13)).

|    | measured value<br>(mg/kg) | standard value<br>(mg/kg) | recovery rate<br>(%) |
|----|---------------------------|---------------------------|----------------------|
| Cr | 64.08                     | 65±2                      | 98.59                |
| Ni | 27.47                     | 28.5±1.2                  | 96.40                |
| Cu | 20.57                     | 21.6±0.8                  | 95.22                |
| Zn | 70.18                     | 65±3                      | 107.97               |
| As | 10.92                     | 10.6±0.8                  | 103.04               |
| Cd | 0.14                      | 0.13±0.01                 | 109.84               |
| Hg | 0.49                      | 0.052±0.006               | 93.97                |
| Pb | 22.52                     | 21.6±1.2                  | 104.24               |

**Table S2.** Contamination categories based on  $I_{geo}$  values.

| $I_{geo}$ | class | pollution level                           |
|-----------|-------|-------------------------------------------|
| ≤ 0       | 0     | Uncontaminated                            |
| 0-1       | 1     | Uncontaminated to moderately contaminated |
| 1-2       | 2     | Moderately contaminated                   |
| 2-3       | 3     | Moderately to heavily contaminated        |
| 3-4       | 4     | Heavily contaminated                      |

|          |   |                                   |
|----------|---|-----------------------------------|
| 4-5      | 5 | Heavily to extremely contaminated |
| > 5      | 6 | Extremely contaminated            |
| $\leq 0$ | 0 | Uncontaminated                    |

**Table S3.** Grades of potential ecological risk.

| $E_r^i$ |                   | RI       |                   |
|---------|-------------------|----------|-------------------|
| <40     | low risk          | <150     | low risk          |
| 40-80   | moderate risk     | 150-300  | moderate risk     |
| 80-160  | considerable risk | 300-600  | considerable risk |
| 160-320 | high risk         | 600-1200 | high risk         |
| >320    | very high risk    | >1200    | very high risk    |
